# Supplementary material
Source: Springer Nature journal article supplement (https://www.springermedizin.de/resource/supplementary/13018_2013_364_MOESM3_ESM.pdf/9636866)

Posterior

Proximal

Distal

Anterior

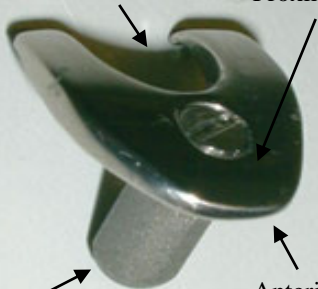

Supplement: MOESM3 [file 9636866]
